# Supplementary material for: Quantitative evaluation of relationships between adsorption and partition of atrazine in biochar-amended soils with biochar characteristics
Source: Royal Society of Chemistry journal article supplement (doi:10.1039/c8ra08544g), 2019-01-01
Supplement: c8ra08544g1.pdf [file c8ra08544g1.pdf]

## Supporting information

### **Quantitative evaluation for the relationship of adsorption and partition of atrazine on biochar-amended soils with biochar characteristics**

Zhendong Zhao<sup>a</sup>, Tiantian Nie<sup>a</sup>, Wenjun Zhou<sup>a,b,\*</sup>, Qianqian Wu<sup>a</sup>

<sup>a</sup>Department of Environmental Science, Zhejiang University, Hangzhou, Zhejiang 310058, China

<sup>b</sup>Zhejiang Provincial Key Laboratory of Organic Pollution Process and Control, Hangzhou, Zhejiang 310058, China

**\*Corresponding author:** Tel: +86-571-88982591; Fax: +86-571-88982591; E-mail address: [wenjunchou@zju.edu.cn](mailto:wenjunchou@zju.edu.cn)

Table S1 Molecular structure and physicochemical properties of atrazine (ATZ).

|                                   |                                                                                    |
|-----------------------------------|------------------------------------------------------------------------------------|
| Molecular structure               | 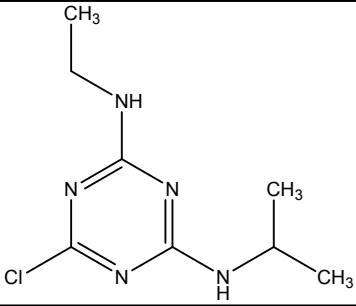 |
| Molecular formula                 | $C_8H_{14}N_5Cl$                                                                   |
| Molar weight ( $g\ mol^{-1}$ )    | 216                                                                                |
| Water solubility ( $mg\ L^{-1}$ ) | 33                                                                                 |
| $\log K_{ow}^a$                   | 2.70                                                                               |
| Melting point ( $^{\circ}C$ )     | 171                                                                                |

<sup>a</sup> $\log K_{ow}$ , octanol-water partition coefficient.

Table S2 Fitting parameters for the Freundlich model and the single point  $K_{OC}$  for atrazine adsorption.

| Sample | Freundlich sorption |       |       |           | Log $K_{oc}$ at $C_e$ (mL/g) |             |            |
|--------|---------------------|-------|-------|-----------|------------------------------|-------------|------------|
|        | $K_F$               | n     | $R^2$ | $K_{FOC}$ | =0.005 $S_w$                 | =0.05 $S_w$ | =0.5 $S_w$ |
| RC300  | 0.676               | 0.647 | 0.978 | 1.231     | 2.326                        | 1.032       | 0.458      |
| RC400  | 0.745               | 0.685 | 0.991 | 1.355     | 2.388                        | 1.157       | 0.561      |
| RC500  | 1.788               | 0.348 | 0.991 | 3.137     | 10.161                       | 2.263       | 0.504      |
| RC600  | 3.048               | 0.260 | 0.992 | 4.983     | 18.909                       | 3.440       | 0.626      |
| RC700  | 7.898               | 0.195 | 0.976 | 12.467    | 53.172                       | 8.331       | 1.305      |
| BC300  | 0.0429              | 0.723 | 0.989 | 0.0588    | 0.0969                       | 0.0512      | 0.0270     |
| BC400  | 0.105               | 0.630 | 0.994 | 0.135     | 0.262                        | 0.112       | 0.0477     |
| BC500  | 0.274               | 0.509 | 0.980 | 0.332     | 0.805                        | 0.260       | 0.0839     |
| BC600  | 0.780               | 0.389 | 0.979 | 0.887     | 2.665                        | 0.653       | 0.160      |
| BC700  | 5.828               | 0.239 | 0.965 | 6.486     | 25.573                       | 4.430       | 0.767      |
| MC300  | 0.506               | 0.773 | 0.994 | 1.106     | 1.664                        | 0.987       | 0.585      |
| MC400  | 0.684               | 0.708 | 0.980 | 1.511     | 2.558                        | 1.305       | 0.666      |
| MC500  | 1.098               | 0.454 | 0.976 | 2.587     | 6.919                        | 1.968       | 0.560      |
| MC600  | 3.858               | 0.273 | 0.999 | 8.700     | 32.234                       | 6.045       | 1.134      |
| MC700  | 4.765               | 0.242 | 0.974 | 11.388    | 44.666                       | 7.789       | 1.358      |

<sup>a</sup>The adsorption data fitted the Freundlich model well ( $R^2 = 0.965-0.999$ ),  $Q_e = K_f C_e^n$ , where  $Q_e$  (mg kg<sup>-1</sup>) and  $C_e$  (mg L<sup>-1</sup>) represents the solid-phase concentration and equilibrium solution-phase concentration, respectively.  $K_f$  ((mg/kg)/(mg/L)<sup>n</sup>) is Freundlich adsorption coefficient and n is an index of isotherm nonlinearity. Log  $K_{oc}$  (log  $K_{oc} = \log Q_e / (C_e f_{oc})$ ) is organic carbon-normalized adsorption coefficient of ATZ on biochars.

Table S3 Fitting parameters for the Freundlich model for atrazine adsorption on biochar-amended soil.

| Sample          | Biochar  | Freundlich sorption |       |                |
|-----------------|----------|---------------------|-------|----------------|
|                 |          | $K_F$               | n     | R <sup>2</sup> |
| Paddy soil (PS) | 0        | 2.110               | 0.979 | 0.985          |
|                 | 2% RC300 | 14.989              | 0.682 | 0.995          |
|                 | 2% RC500 | 35.892              | 0.531 | 0.992          |
|                 | 2% RC700 | 98.265              | 0.374 | 0.991          |
|                 | 2% BC300 | 2.925               | 0.875 | 0.995          |
|                 | 2% BC500 | 27.893              | 0.431 | 0.988          |
|                 | 2% BC700 | 82.458              | 0.320 | 0.971          |
|                 | 2% MC300 | 12.779              | 0.811 | 0.996          |
|                 | 2% MC500 | 23.115              | 0.539 | 0.990          |
|                 | 2% MC700 | 69.823              | 0.413 | 0.989          |
| Black soil (BS) | 0        | 6.724               | 0.776 | 0.998          |
|                 | 2% RC300 | 18.168              | 0.678 | 0.999          |
|                 | 2% RC500 | 41.476              | 0.472 | 0.997          |
|                 | 2% RC700 | 112.876             | 0.359 | 0.982          |
|                 | 2% BC300 | 7.301               | 0.729 | 0.994          |
|                 | 2% BC500 | 25.710              | 0.462 | 0.998          |
|                 | 2% BC700 | 80.501              | 0.319 | 0.984          |
|                 | 2% MC300 | 15.129              | 0.778 | 0.997          |
|                 | 2% MC500 | 27.409              | 0.523 | 0.993          |
|                 | 2% MC700 | 75.561              | 0.403 | 0.986          |

Fig. S1 X-ray diffraction patterns of biochars from different biomass.

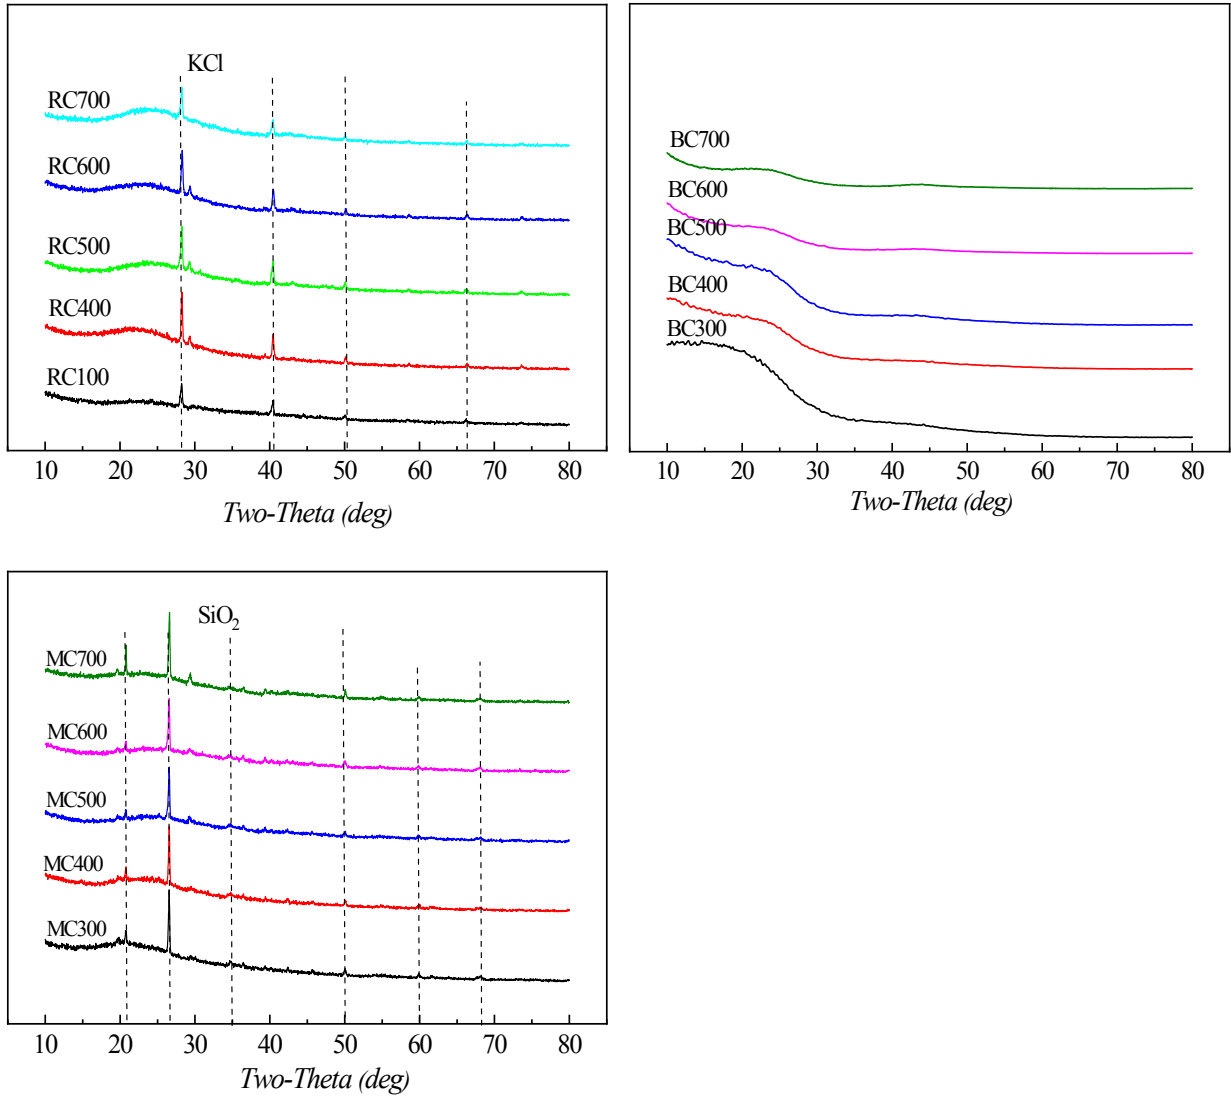

Fig. S2 Van Krevelen diagram for biochar produced from different feedstocks at 300°C–700°C.

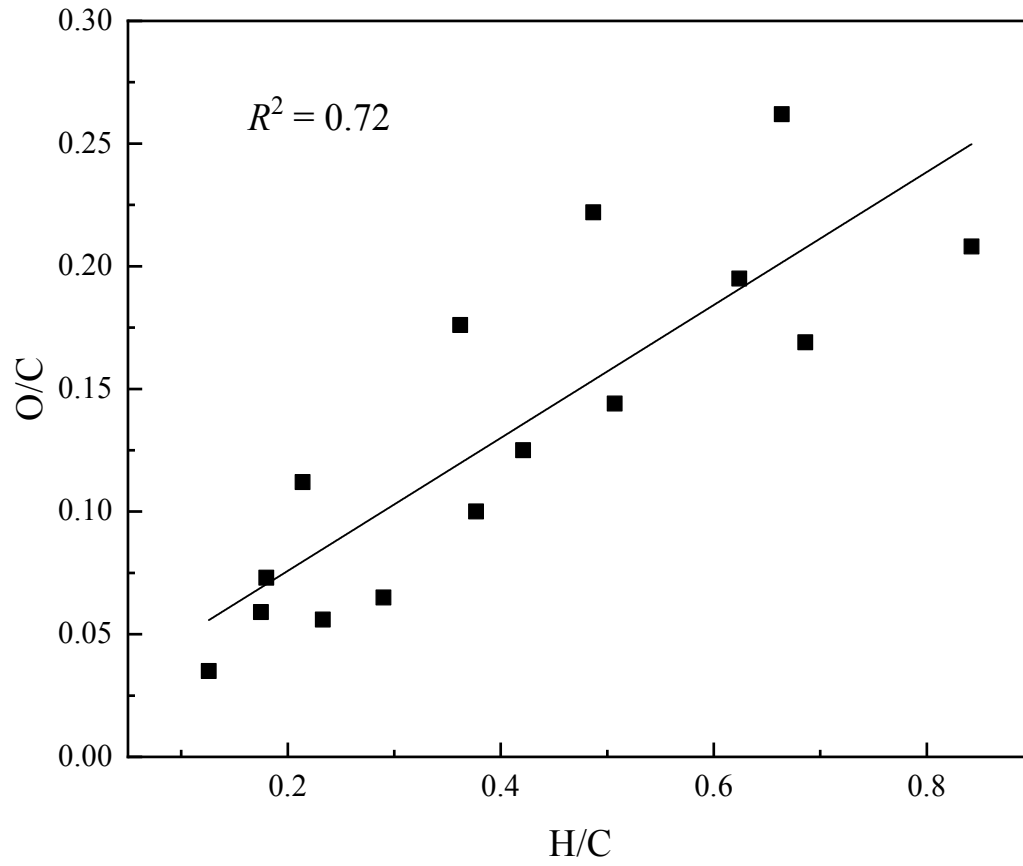

Fig. S3 FTIR spectra of the biochars from different biomass.

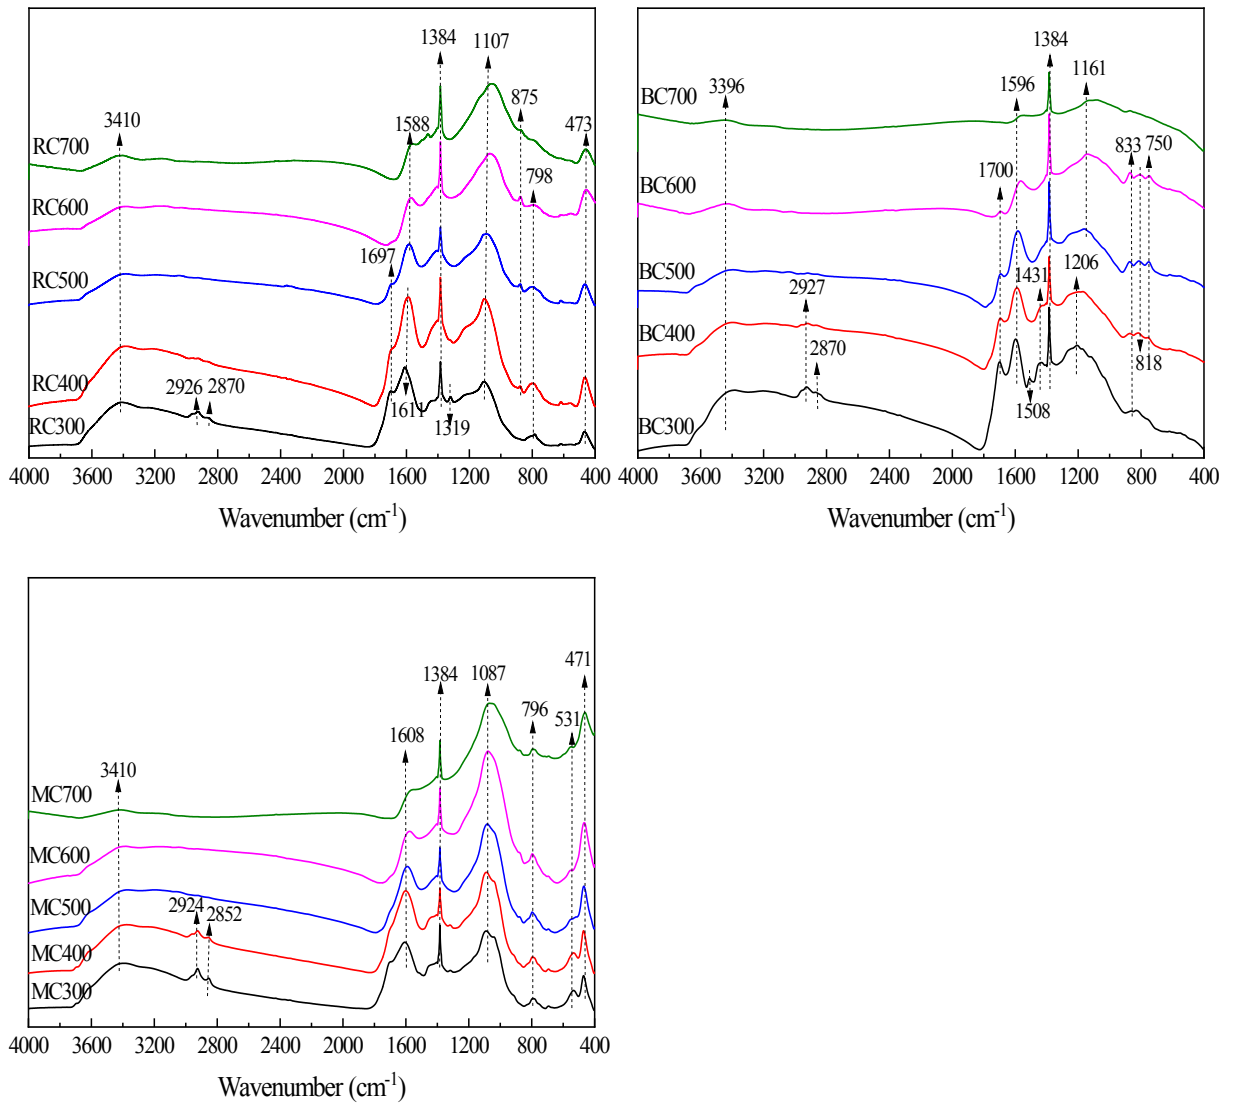

Fig. S4 Adsorption isotherms of ATZ on RC300–700, BC300–700, and MC300–700.

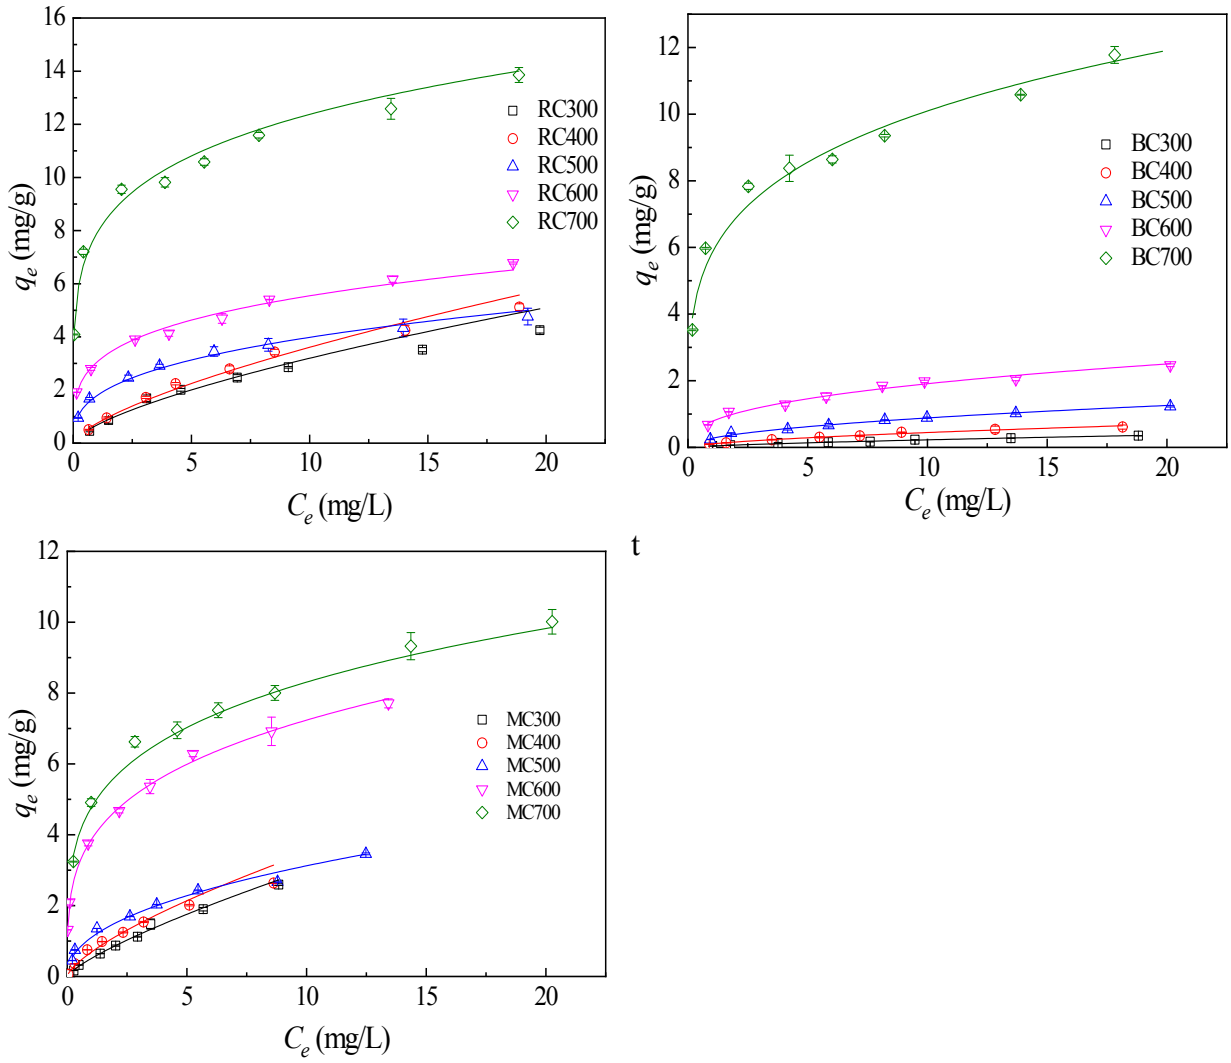



Fig. S5 Correlations between  $n$  values of ATZ adsorption on biochars and H/C, O/C, and (O + N)/C atomic ratio of the biochars.

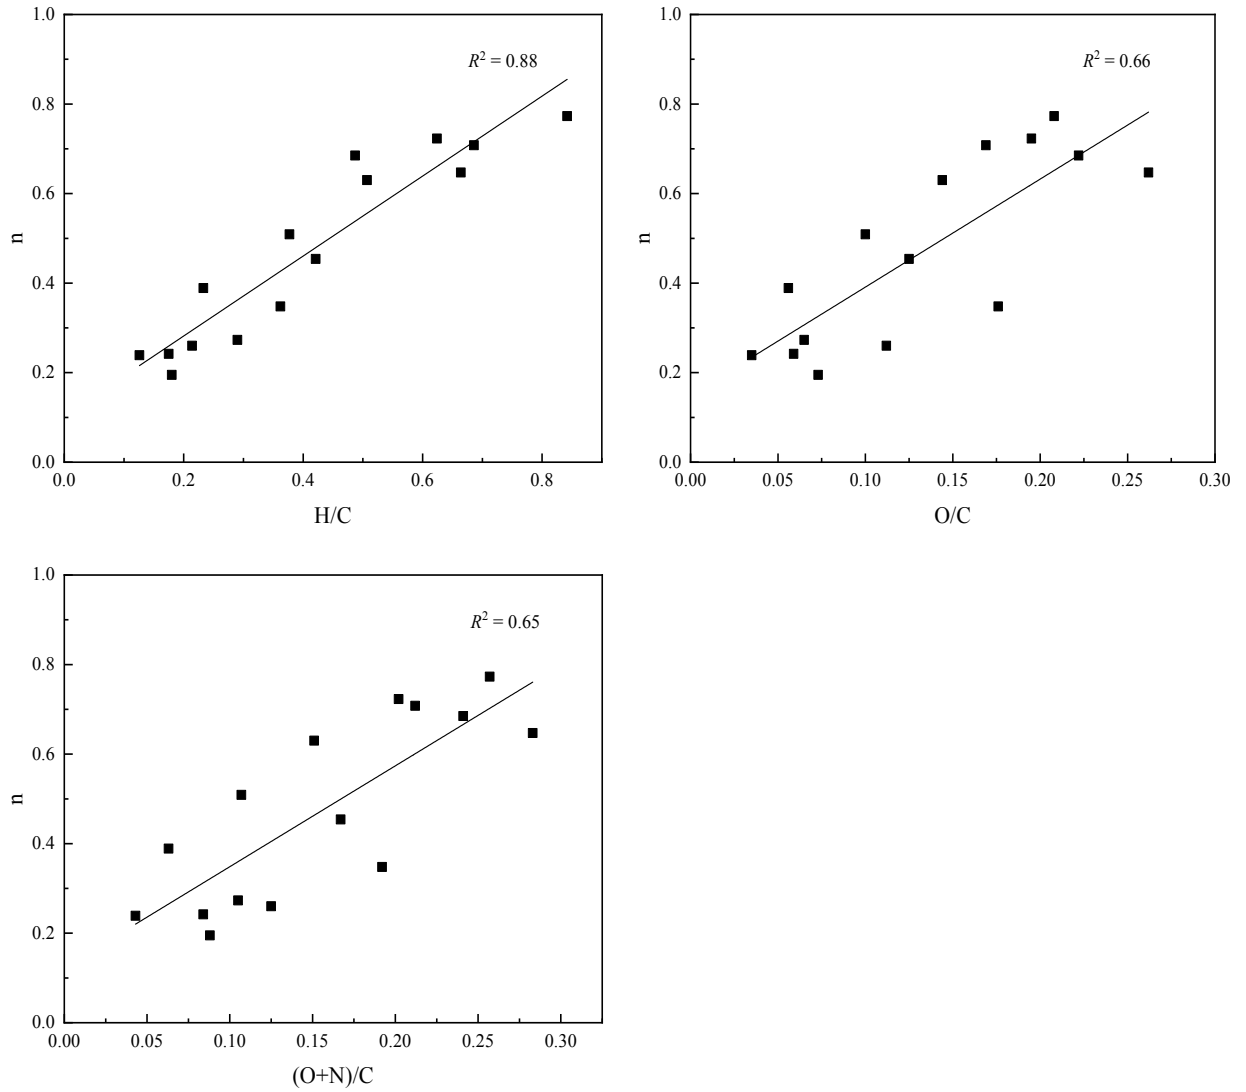

**Biochars production.** Briefly, the ground rice straws, bamboo, and cow manure were placed into a lab-scale tubular reactor within a muffle furnace and pyrolyzed at 300–700°C under a N<sub>2</sub> atmosphere with a heating rate of 15°C min<sup>-1</sup>. The solid residues in the reactor were rinsed with deionized water several times to remove water-soluble matter, dried at 105°C for 24 h and homogenized to pass through a 0.15 mm sieve. The obtained biochars were denoted as RCX, BCX, and MCX, where RC, BC, and MC referred to rice straw biochar, bamboo biochar, and cow manure biochar, respectively, and X referred to the pyrolysis temperature.
